# Supplementary material for: Dose–Response Study of Microcystin Congeners MCLA, MCLR, MCLY, MCRR, and MCYR Administered Orally to Mice
Source: PubMed Central journal article supplement (PMC7911753; doi:10.3390/toxins13020086), 2021-01-24
Supplement: toxins-13-00086-s001.pdf [file toxins-13-00086-s001.pdf]

# Supplementary Materials: Dose-Response Study of Microcystin Congeners MCLA, MCLR, MCLY, MCRR, and MCYR Administered Orally to Mice

Neil Chernoff, Donna Hill, Johnsie Lang, Judith Schmid, Amy Farthing and Hwa Huang

Table S1. Summary of data for MCLA<sup>1</sup>.

| Male                            |               |                   |               |                    |                    |
|---------------------------------|---------------|-------------------|---------------|--------------------|--------------------|
| Dose                            | Control       | 0.5 mg/kg         | 1 mg/kg       | 3 mg/kg            | 7 mg/kg            |
| Number of animals               | 24            | 12                | 12            | 6                  | 8                  |
| Morbidity (%)                   | 0             | 0                 | 0             | 0                  | 100.0 ***          |
| Weight Change (g.)              | -1.89 ± 0.15  | -2.26 ± 0.20      | -1.64 ± 0.20  | -2.63 ± 0.26 **    | -1.42 ± 0.24       |
| Liver weight (g.)               | 1.07 ± 0.02   | 1.13 ± 0.03       | 1.12 ± 0.03   | 1.17 ± 0.05        | 1.88 ± 0.04 ***    |
| Liver/body weight               | 4.97 ± 0.10   | 5.02 ± 0.14       | 5.09 ± 0.14   | 5.78 ± 0.18 ***    | 8.96 ± 0.17 ***    |
| ALT (log <sub>10</sub> (IU/L))  | 1.76 ± 0.06   | 1.65 ± 0.08       | 1.67 ± 0.08   | 3.47 ± 0.12 ***    | 4.05 ± 0.17 ***    |
| AST (log <sub>10</sub> (IU/L))  | 2.06 ± 0.06   | 1.98 ± 0.08       | 2.01 ± 0.08   | 3.51 ± 0.12 ***    | 3.84 ± 0.16 ***    |
| GLDH (log <sub>10</sub> (IU/L)) | 1.28 ± 0.03   | 1.22 ± 0.05       | 1.17 ± 0.05   | 2.37 ± 0.08 ***    | 2.44 ± 0.09 ***    |
| Liver score                     | 2.92 ± 0.41   | 4.18 ± 0.62       | 3.00 ± 0.43   | 9.67 ± 0.33 **     | 16.00 ± 0.00 ***   |
| BUN (mg/dL)                     | 8.69 ± 0.66   | 10.19 ± 0.81 *    | 9.07 ± 0.81   | 8.26 ± 0.97        | 13.24 ± 1.27 ***   |
| Cr (mg/dL)                      | 0.50 ± 0.02   | 0.49 ± 0.03       | 0.50 ± 0.03   | 0.42 ± 0.03 **     | 0.53 ± 0.04        |
| BUN_Cr                          | 17.63 ± 1.03  | 20.22 ± 1.36 *    | 17.56 ± 1.36  | 19.08 ± 1.72       | 24.65 ± 2.31 **    |
| Albumin (g/dL)                  | 3.65 ± 0.09   | 3.70 ± 0.11       | 3.63 ± 0.11   | 3.63 ± 0.14        | 2.83 ± 0.19 ***    |
| Globulin(g/dL)                  | 2.39 ± 0.39   | 2.44 ± 0.40       | 2.23 ± 0.40   | 2.16 ± 0.41        | 1.62 ± 0.43 ***    |
| Total protein (g/L)             | 6.04 ± 0.40   | 6.17 ± 0.43       | 5.89 ± 0.43   | 5.81 ± 0.45        | 4.43 ± 0.52 ***    |
| Glucose (mg/dL)                 | 238.33 ± 6.56 | 185.60 ± 9.28 *** | 228.04 ± 9.28 | 110.01 ± 13.13 *** | 124.09 ± 18.57 *** |
| Total bilirubin (mg/dL)         | 0.12 ± 0.12   | 0.11 ± 0.16       | 0.07 ± 0.16   | 2.02 ± 0.24 ***    | 1.12 ± 0.31 **     |

  

| Female                          |                |                |                |                    |                   |
|---------------------------------|----------------|----------------|----------------|--------------------|-------------------|
| Dose                            | Control        | 0.5 mg/kg      | 1 mg/kg        | 3 mg/kg            | 7 mg/kg           |
| Number of animals               | 24             | 12             | 12             | 6                  | 8                 |
| Morbidity (%)                   | 0              | 0              | 0              | 0                  | 62.5 **           |
| Weight Change (g.)              | -1.41 ± 0.08   | -1.37 ± 0.11   | -1.43 ± 0.11   | -2.47 ± 0.16 ***   | -2.06 ± 0.14 ***  |
| Liver weight (g.)               | 0.80 ± 0.03    | 0.83 ± 0.04    | 0.88 ± 0.04 *  | 0.97 ± 0.05 ***    | 1.21 ± 0.04 ***   |
| Liver/body weight               | 4.60 ± 0.11    | 4.64 ± 0.15    | 4.83 ± 0.15    | 6.04 ± 0.19 ***    | 7.25 ± 0.16 ***   |
| ALT (log <sub>10</sub> (IU/L))  | 1.89 ± 0.13    | 2.05 ± 0.18    | 1.85 ± 0.18    | 3.37 ± 0.24 ***    | 3.90 ± 0.21 ***   |
| AST (log <sub>10</sub> (IU/L))  | 2.26 ± 0.08    | 2.42 ± 0.12    | 2.21 ± 0.12    | 3.58 ± 0.16 ***    | 4.38 ± 0.17 ***   |
| GLDH (log <sub>10</sub> (IU/L)) | 1.39 ± 0.09    | 1.48 ± 0.13    | 1.33 ± 0.13    | 1.82 ± 0.17 *      | 1.79 ± 0.18 *     |
| Liver score                     | 1.00 ± 0.36    | 2.50 ± 0.54    | 3.67 ± 0.59    | 9.50 ± 0.22 **     | 13.75 ± 1.40 ***  |
| BUN (mg/dL)                     | 8.91 ± 0.54    | 8.78 ± 0.77    | 8.77 ± 0.77    | 8.89 ± 1.07        | 11.88 ± 0.95 **   |
| Cr (mg/dL)                      | 0.51 ± 0.02    | 0.50 ± 0.03    | 0.50 ± 0.03    | 0.41 ± 0.04 **     | 0.39 ± 0.03 ***   |
| BUN_Cr                          | 17.54 ± 0.77   | 18.17 ± 1.09   | 17.99 ± 1.09   | 21.63 ± 1.55 *     | 29.24 ± 1.43 ***  |
| Albumin (g/dL)                  | 3.76 ± 0.25    | 3.66 ± 0.32    | 3.78 ± 0.32    | 3.43 ± 0.39        | 4.46 ± 0.34 *     |
| Globulin(g/dL)                  | 2.20 ± 0.42    | 2.28 ± 0.43    | 2.28 ± 0.43    | 2.14 ± 0.44        | 1.97 ± 0.44       |
| Total protein (g/L)             | 5.91 ± 0.41    | 5.98 ± 0.48    | 6.09 ± 0.48    | 5.67 ± 0.56        | 6.42 ± 0.50       |
| Glucose (mg/dL)                 | 208.76 ± 12.86 | 199.74 ± 16.15 | 213.46 ± 16.15 | 102.60 ± 19.65 *** | 88.50 ± 17.45 *** |
| Total bilirubin (mg/dL)         | 0.12 ± 0.15    | 0.10 ± 0.19    | 0.15 ± 0.20    | 2.72 ± 0.30 ***    | 4.33 ± 0.25 ***   |

All significance tests of difference from control. Mortality statistical significance by Fisher's exact test; liver score by Cochran-Mantel-Haenszel chi-square; \*  $p \leq 0.05$  for differences from controls; \*\*  $p \leq 0.01$  for differences from controls; \*\*\*  $p \leq 0.001$  for differences from controls.

Table S2. Summary of data for MCLR<sup>1</sup>.

## MCLR

| Male                            |                |                |                |                |                 |                    |                  |                 |
|---------------------------------|----------------|----------------|----------------|----------------|-----------------|--------------------|------------------|-----------------|
| Dose                            | Control        | 0.5 mg/kg      | 1 mg/kg        | 3 mg/kg        | 5 mg/kg         | 7 mg/kg            | 9 mg/kg          | 11 mg/kg        |
| Number of animals               | 24             | 6              | 6              | 12             | 6               | 14                 | 6                | 6               |
| Moribundity (%)                 | 0              | 0              | 0              | 0              | 33.3            | 28.6 *             | 100.0 **         | 100.0 **        |
| Weight Change (g.)              | -1.96 ± 0.24   | -2.01 ± 0.38   | -1.90 ± 0.38   | -2.01 ± 0.29   | -2.96 ± 0.35 ** | -2.74 ± 0.27 **    | -1.67 ± 0.37     | -1.08 ± 0.35 ** |
| Liver weight (g.)               | 1.03 ± 0.04    | 1.09 ± 0.09    | 1.23 ± 0.09 *  | 1.07 ± 0.06    | 1.29 ± 0.08 **  | 1.25 ± 0.06 **     | 1.69 ± 0.09 ***  | 1.82 ± 0.08 *** |
| Liver/body weight               | 5.02 ± 0.25    | 5.16 ± 0.45    | 5.31 ± 0.43    | 5.24 ± 0.31    | 6.58 ± 0.39 *** | 6.54 ± 0.29 ***    | 8.33 ± 0.42 ***  | 8.81 ± 0.39 *** |
| ALT (log <sub>10</sub> (IU/L))  | 1.76 ± 0.16    | 1.82 ± 0.28    | 1.80 ± 0.28    | 2.09 ± 0.21    | 2.98 ± 0.26 *** | 3.31 ± 0.19 ***    | 3.68 ± 0.30 ***  | 3.31 ± 0.28 *** |
| AST (log <sub>10</sub> (IU/L))  | 2.08 ± 0.12    | 2.14 ± 0.22    | 2.01 ± 0.22    | 2.24 ± 0.16    | 2.76 ± 0.20 **  | 2.91 ± 0.14 ***    | 3.22 ± 0.24 ***  | 2.91 ± 0.22 *** |
| GLDH (log <sub>10</sub> (IU/L)) | 1.34 ± 0.11    | 1.41 ± 0.19    | 1.32 ± 0.19    | 1.52 ± 0.14    | 1.86 ± 0.18 **  | 2.14 ± 0.13 ***    | 2.22 ± 0.20 *    | 1.70 ± 0.19     |
| Liver score                     | 3.79 ± 0.68    | 5.50 ± 0.92    | 5.33 ± 0.76    | 4.42 ± 1.16    | 11.00 ± 2.53 ** | 12.07 ± 0.97 ***   | 15.83 ± 0.17 **  | 16.00 ± 0.00 ** |
| BUN (mg/dL)                     | 9.28 ± 0.33    | 9.87 ± 0.66    | 9.97 ± 0.66    | 10.06 ± 0.46   | 9.53 ± 0.66     | 10.58 ± 0.45 *     | 9.25 ± 0.80      | 10.53 ± 0.72    |
| Cr (mg/dL)                      | 0.46 ± 0.03    | 0.50 ± 0.04    | 0.50 ± 0.04    | 0.48 ± 0.03    | 0.44 ± 0.04     | 0.45 ± 0.03        | 0.39 ± 0.04      | 0.52 ± 0.04     |
| BUN_Cr                          | 20.63 ± 1.72   | 19.52 ± 3.23   | 19.81 ± 3.23   | 21.44 ± 2.30   | 24.20 ± 3.02    | 24.00 ± 2.11       | 35.86 ± 3.58 *** | 21.04 ± 3.25    |
| Albumin (g/dL)                  | 3.45 ± 0.16    | 3.68 ± 0.23    | 3.71 ± 0.23    | 3.64 ± 0.19    | 3.44 ± 0.22     | 3.41 ± 0.17        | 2.51 ± 0.25 ***  | 3.05 ± 0.23     |
| Globulin (g/dL)                 | 1.93 ± 0.18    | 2.17 ± 0.22    | 2.22 ± 0.22    | 2.12 ± 0.19    | 1.88 ± 0.21     | 1.88 ± 0.18        | 1.43 ± 0.23 **   | 1.78 ± 0.22     |
| Total protein (g/L)             | 5.42 ± 0.24    | 5.85 ± 0.36    | 5.93 ± 0.36    | 5.72 ± 0.28    | 5.24 ± 0.34     | 5.30 ± 0.26        | 3.88 ± 0.39 ***  | 4.74 ± 0.36 *   |
| Glucose (mg/dL)                 | 192.76 ± 15.57 | 231.82 ± 26.02 | 188.78 ± 26.02 | 211.98 ± 19.52 | 153.58 ± 24.25  | 102.58 ± 18.92 *** | 157.90 ± 28.03   | 168.82 ± 25.79  |
| Total bilirubin (mg/dL)         | 0.16 ± 0.04    | 0.12 ± 0.06    | 0.18 ± 0.06    | 0.15 ± 0.05    | 0.35 ± 0.07 **  | 0.29 ± 0.04 **     | 0.21 ± 0.07      | 0.33 ± 0.06 **  |

  

| Female                          |              |              |              |              |                 |                  |                  |                 |
|---------------------------------|--------------|--------------|--------------|--------------|-----------------|------------------|------------------|-----------------|
| Dose                            | Control      | 0.5 mg/kg    | 1 mg/kg      | 3 mg/kg      | 5 mg/kg         | 7 mg/kg          | 9 mg/kg          | 11 mg/kg        |
| Number of animals               | 24           | 6            | 6            | 12           | 6               | 15               | 9                | 6               |
| Moribundity (%)                 | 0            | 0            | 0            | 0            | 0               | 6.7              | 100.0 **         | 100.0 **        |
| Weight Change (g.)              | -1.60 ± 0.11 | -1.69 ± 0.20 | -1.31 ± 0.20 | -1.50 ± 0.14 | -2.59 ± 0.19    | -2.69 ± 0.13 *** | -0.45 ± 0.17 *** | -0.89 ± 0.21 ** |
| Liver weight (g.)               | 0.81 ± 0.03  | 0.89 ± 0.05  | 0.87 ± 0.05  | 0.82 ± 0.04  | 0.81 ± 0.05     | 0.92 ± 0.03 **   | 1.44 ± 0.04 ***  | 1.39 ± 0.05 *** |
| Liver/body weight               | 4.60 ± 0.18  | 4.87 ± 0.29  | 4.65 ± 0.29  | 4.75 ± 0.22  | 4.98 ± 0.27     | 5.62 ± 0.20 ***  | 8.04 ± 0.24 ***  | 7.61 ± 0.27 *** |
| ALT (log <sub>10</sub> (IU/L))  | 1.87 ± 0.13  | 1.69 ± 0.31  | 1.85 ± 0.26  | 1.90 ± 0.18  | 2.94 ± 0.25 *** | 3.41 ± 0.16 ***  | 3.35 ± 0.25 ***  | 3.38 ± 0.29 *** |
| AST (log <sub>10</sub> (IU/L))  | 2.24 ± 0.11  | 1.95 ± 0.26  | 2.14 ± 0.22  | 2.20 ± 0.15  | 2.80 ± 0.21 *   | 3.17 ± 0.13 ***  | 3.22 ± 0.21 ***  | 3.23 ± 0.26 *** |
| GLDH (log <sub>10</sub> (IU/L)) | 1.40 ± 0.10  | 1.08 ± 0.22  | 1.31 ± 0.19  | 1.37 ± 0.13  | 2.05 ± 0.18 **  | 2.31 ± 0.12 ***  | 1.78 ± 0.18      | 1.61 ± 0.21     |
| Liver score                     | 0.79 ± 0.32  | 3.83 ± 0.17  | 3.83 ± 0.17  | 1.83 ± 0.51  | 9.00 ± 1.21 **  | 9.20 ± 0.82 ***  | 16.00 ± 0.00 *** | 16.00 ± 0.00 ** |
| BUN (mg/dL)                     | 8.55 ± 0.61  | 8.04 ± 1.36  | 9.41 ± 1.17  | 9.08 ± 0.83  | 9.41 ± 1.10     | 10.66 ± 0.72 *   | 9.88 ± 1.11      | 11.41 ± 1.30 *  |

|                         |                |                |                |                |                   |                    |                |                 |
|-------------------------|----------------|----------------|----------------|----------------|-------------------|--------------------|----------------|-----------------|
| Cr (mg/dL)              | 0.49 ± 0.03    | 0.43 ± 0.05    | 0.49 ± 0.04    | 0.48 ± 0.03    | 0.49 ± 0.04       | 0.49 ± 0.03        | 0.51 ± 0.04    | 0.52 ± 0.04     |
| BUN_Cr                  | 17.25 ± 0.99   | 18.76 ± 2.24   | 18.80 ± 1.92   | 18.11 ± 1.34   | 20.41 ± 1.80      | 22.24 ± 1.18 ***   | 21.89 ± 1.81 * | 24.06 ± 2.14 ** |
| Albumin (g/dL)          | 3.73 ± 0.16    | 3.29 ± 0.29    | 3.51 ± 0.26    | 3.86 ± 0.20    | 3.89 ± 0.24       | 3.69 ± 0.18        | 2.93 ± 0.25 ** | 3.12 ± 0.28 *   |
| Globulin(g/dL)          | 1.83 ± 0.22    | 1.50 ± 0.27    | 1.66 ± 0.26    | 1.89 ± 0.23    | 1.92 ± 0.25       | 1.67 ± 0.22        | 1.43 ± 0.25 *  | 1.45 ± 0.26 *   |
| Total protein (g/L)     | 5.52 ± 0.27    | 4.78 ± 0.47    | 5.15 ± 0.42    | 5.73 ± 0.33    | 5.79 ± 0.39       | 5.36 ± 0.30        | 4.34 ± 0.39 ** | 4.55 ± 0.44 *   |
| Glucose (mg/dL)         | 211.88 ± 16.16 | 176.12 ± 38.41 | 222.87 ± 32.37 | 164.91 ± 22.19 | 104.46 ± 30.98 ** | 100.47 ± 19.79 *** | 217.97 ± 31.12 | 135.09 ± 37.25  |
| Total bilirubin (mg/dL) | 0.17 ± 0.05    | 0.19 ± 0.09    | 0.17 ± 0.08    | 0.18 ± 0.06    | 0.17 ± 0.07       | 0.20 ± 0.05        | 0.32 ± 0.07 *  | 0.20 ± 0.08     |

All significance tests of difference from control. Mortality statistical significance by Fisher's exact test; liver score by Cochran-Mantel-Haenszel chi-square; \*  $p \leq 0.05$  for differences from controls; \*\*  $p \leq 0.01$  for differences from controls; \*\*\*  $p \leq 0.001$  for differences from controls.

Table S3. Summary of data for MCLY<sup>1</sup>.

| <b>Male</b>                     |                |                |                |                    |                    |
|---------------------------------|----------------|----------------|----------------|--------------------|--------------------|
| Dose                            | Control        | 1 mg/kg        | 3 mg/kg        | 5 mg/kg            | 7 mg/kg            |
| Number of animals               | 27             | 6              | 14             | 13                 | 8                  |
| Morbidity (%)                   | 0              | 0              | 0              | 0                  | 25                 |
| Weight Change (g.)              | -2.01 ± 0.16   | -1.31 ± 0.31 * | -1.74 ± 0.21   | -2.72 ± 0.21 **    | -2.18 ± 0.26       |
| Liver weight (g.)               | 1.09 ± 0.08    | 0.89 ± 0.12    | 1.09 ± 0.09    | 1.15 ± 0.09        | 1.45 ± 0.10 ***    |
| Liver/body weight               | 5.01 ± 0.28    | 4.66 ± 0.43    | 4.94 ± 0.33    | 5.39 ± 0.24        | 6.67 ± 0.37 ***    |
| ALT (log <sub>10</sub> (IU/L))  | 1.64 ± 0.07    | 1.83 ± 0.15    | 1.63 ± 0.10    | 2.08 ± 0.10 ***    | 2.38 ± 0.15 ***    |
| AST (log <sub>10</sub> (IU/L))  | 2.02 ± 0.05    | 2.04 ± 0.11    | 1.90 ± 0.07    | 2.25 ± 0.07 *      | 2.44 ± 0.11 **     |
| GLDH (log <sub>10</sub> (IU/L)) | 1.22 ± 0.06    | 1.32 ± 0.13    | 1.21 ± 0.09    | 1.65 ± 0.09 ***    | 1.95 ± 0.13 ***    |
| Liver score                     | 3.48 ± 0.51    | 3.00 ± 1.00    | 1.93 ± 0.54 *  | 5.62 ± 0.98        | 7.75 ± 2.28 *      |
| BUN (mg/dL)                     | 8.92 ± 0.40    | 9.27 ± 0.85    | 9.93 ± 0.56    | 9.31 ± 0.58        | 10.51 ± 0.82       |
| Cr (mg/dL)                      | 0.52 ± 0.05    | 0.49 ± 0.06    | 0.51 ± 0.05    | 0.51 ± 0.05        | 0.50 ± 0.06        |
| BUN_Cr                          | 17.64 ± 1.37   | 21.31 ± 2.00   | 19.70 ± 1.61   | 19.89 ± 1.60       | 20.30 ± 1.88       |
| Albumin (g/dL)                  | 3.57 ± 0.08    | 3.58 ± 0.15    | 3.62 ± 0.11    | 3.62 ± 0.11        | 3.57 ± 0.14        |
| Globulin(g/dL)                  | 2.05 ± 0.17    | 1.95 ± 0.19    | 2.11 ± 0.18    | 2.11 ± 0.18        | 1.95 ± 0.19        |
| Total protein (g/L)             | 5.58 ± 0.13    | 5.54 ± 0.25    | 5.70 ± 0.17    | 5.72 ± 0.18        | 5.53 ± 0.23        |
| Glucose (mg/dL)                 | 205.32 ± 7.60  | 212.96 ± 16.09 | 202.53 ± 10.51 | 151.87 ± 10.86 *** | 130.77 ± 15.49 *** |
| Total bilirubin (mg/dL)         | 0.23 ± 0.07    | 0.01 ± 0.10 ** | 0.21 ± 0.08    | 0.26 ± 0.08        | 0.22 ± 0.09        |
| <b>Female</b>                   |                |                |                |                    |                    |
| Dose                            | Control        | 1 mg/kg        | 3 mg/kg        | 5 mg/kg            | 7 mg/kg            |
| Number of animals               | 27             | 6              | 14             | 14                 | 8                  |
| Morbidity (%)                   | 0              | 0              | 0              | 0                  | 0                  |
| Weight Change (g.)              | -1.41 ± 0.10   | -1.20 ± 0.21   | -1.57 ± 0.14   | -1.90 ± 0.14       | -2.53 ± 0.18 ***   |
| Liver weight (g.)               | 0.83 ± 0.04    | 0.78 ± 0.05    | 0.88 ± 0.04    | 0.95 ± 0.04 ***    | 0.94 ± 0.05 **     |
| Liver/body weight               | 4.64 ± 0.16    | 4.35 ± 0.26    | 4.86 ± 0.19    | 5.18 ± 0.19 **     | 5.72 ± 0.22 ***    |
| ALT (log <sub>10</sub> (IU/L))  | 1.87 ± 0.13    | 1.46 ± 0.26    | 1.98 ± 0.18    | 2.07 ± 0.18        | 2.41 ± 0.22 *      |
| AST (log <sub>10</sub> (IU/L))  | 2.26 ± 0.09    | 1.98 ± 0.18    | 2.31 ± 0.12    | 2.38 ± 0.12        | 2.75 ± 0.16 **     |
| GLDH (log <sub>10</sub> (IU/L)) | 1.33 ± 0.10    | 1.00 ± 0.19    | 1.42 ± 0.13    | 1.65 ± 0.13 *      | 1.70 ± 0.16 *      |
| Liver score                     | 0.85 ± 0.30    | 1.67 ± 1.09    | 2.36 ± 0.62    | 5.14 ± 0.74 **     | 5.50 ± 1.59 **     |
| BUN (mg/dL)                     | 9.21 ± 0.49    | 9.46 ± 0.91    | 7.71 ± 0.64 *  | 8.61 ± 0.64        | 8.68 ± 0.76        |
| Cr (mg/dL)                      | 0.55 ± 0.06    | 0.56 ± 0.07    | 0.54 ± 0.06    | 0.55 ± 0.06        | 0.48 ± 0.07        |
| BUN_Cr                          | 17.09 ± 1.30   | 17.93 ± 2.02   | 14.71 ± 1.57   | 32.76 ± 18.71      | 33.08 ± 20.56      |
| Albumin (g/dL)                  | 3.78 ± 0.12    | 3.76 ± 0.20    | 3.82 ± 0.15    | 3.72 ± 0.15        | 3.46 ± 0.17 *      |
| Globulin(g/dL)                  | 1.86 ± 0.22    | 1.89 ± 0.25    | 1.85 ± 0.23    | 1.89 ± 0.23        | 1.58 ± 0.24 *      |
| Total protein (g/L)             | 5.59 ± 0.23    | 5.64 ± 0.34    | 5.66 ± 0.27    | 5.59 ± 0.27        | 5.07 ± 0.30 *      |
| Glucose (mg/dL)                 | 198.85 ± 13.27 | 234.2 ± 23.53  | 220.22 ± 16.90 | 177.18 ± 16.90     | 133.22 ± 19.74 **  |
| Total bilirubin (mg/dL)         | 0.18 ± 0.16    | 0.02 ± 0.28    | 0.26 ± 0.21    | 0.59 ± 0.20 *      | 0.59 ± 0.23        |

All significance tests of difference from control. Mortality statistical significance by Fisher's exact test; liver score by Cochran-Mantel-Haenszel chi-square; \*  $p \leq 0.05$  for differences from controls; \*\*  $p \leq 0.01$  for differences from controls; \*\*\*  $p \leq 0.001$  for differences from controls.

Table S4. Summary of data for MCRR<sup>1</sup>.

| <b>Male</b>                     |               |                |                 |                |                |
|---------------------------------|---------------|----------------|-----------------|----------------|----------------|
| Dose                            | Control       | 7 mg/kg        | 9 mg/kg         | 11 mg/kg       | 22 mg/kg       |
| Number of animals               | 21            | 9              | 6               | 9              | 3              |
| Morbidity (%)                   | 0             | 0              | 0               | 0              | 0              |
| Weight Change (g.)              | -1.97 ± 0.17  | -1.92 ± 0.22   | -1.50 ± 0.29    | -2.26 ± 0.24   | -2.79 ± 0.35 * |
| Liver weight (g.)               | 1.02 ± 0.01   | 1.03 ± 0.02    | 1.11 ± 0.03 **  | 1.09 ± 0.02 *  | 0.92 ± 0.04 *  |
| Liver/body weight               | 4.88 ± 0.10   | 5.01 ± 0.12    | 5.22 ± 0.15 *   | 5.02 ± 0.13    | 4.77 ± 0.18    |
| ALT (log <sub>10</sub> (IU/L))  | 1.65 ± 0.06   | 1.89 ± 0.08 *  | 1.54 ± 0.10     | 1.55 ± 0.08    | 1.65 ± 0.15    |
| AST (log <sub>10</sub> (IU/L))  | 2.04 ± 0.04   | 2.17 ± 0.07    | 1.88 ± 0.08     | 1.96 ± 0.07    | 2.08 ± 0.11    |
| GLDH (log <sub>10</sub> (IU/L)) | 1.22 ± 0.04   | 1.34 ± 0.05 *  | 1.13 ± 0.07     | 1.23 ± 0.05    | 1.30 ± 0.09    |
| Liver score                     | 3.00 ± 0.40   | 3.00 ± 0.58    | 3.83 ± 0.31     | 3.89 ± 0.48    | 4.00 ± 0.00    |
| BUN (mg/dL)                     | 9.46 ± 0.28   | 9.45 ± 0.43    | 7.21 ± 0.53 *** | 8.24 ± 0.43 *  | 9.12 ± 0.74    |
| Cr (mg/dL)                      | 0.55 ± 0.05   | 0.55 ± 0.05    | 0.47 ± 0.06 *   | 0.48 ± 0.05 *  | 0.53 ± 0.06    |
| BUN_Cr                          | 17.7 ± 1.29   | 17.29 ± 1.44   | 15.50 ± 1.68    | 17.39 ± 1.52   | 17.54 ± 1.85   |
| Albumin (g/dL)                  | 3.61 ± 0.08   | 3.54 ± 0.11    | 3.44 ± 0.14     | 3.58 ± 0.12    | 3.90 ± 0.18    |
| Globulin(g/dL)                  | 2.03 ± 0.21   | 1.92 ± 0.21    | 2.00 ± 0.23     | 2.22 ± 0.22    | 2.17 ± 0.24    |
| Total protein (g/L)             | 5.62 ± 0.19   | 5.44 ± 0.24    | 5.49 ± 0.30     | 5.83 ± 0.25    | 6.10 ± 0.34    |
| Glucose (mg/dL)                 | 216.88 ± 8.75 | 224.05 ± 12.60 | 218.70 ± 16.36  | 215.71 ± 13.24 | 183.48 ± 21.35 |
| Total bilirubin (mg/dL)         | 0.18 ± 0.06   | 0.15 ± 0.08    | 0.28 ± 0.09     | 0.26 ± 0.08    | 0.25 ± 0.12    |

  

| <b>Female</b>                   |                |                |                 |                |                  |
|---------------------------------|----------------|----------------|-----------------|----------------|------------------|
| Dose                            | Control        | 7 mg/kg        | 9 mg/kg         | 11 mg/kg       | 22 mg/kg         |
| Number of animals               | 21             | 8              | 6               | 9              | 3                |
| Morbidity (%)                   | 0              | 0              | 0               | 0              | 0                |
| Weight Change (g.)              | -1.30 ± 0.09   | -1.51 ± 0.13   | -1.89 ± 0.17 ** | -1.67 ± 0.14 * | -2.16 ± 0.21 *** |
| Liver weight (g.)               | 0.85 ± 0.04    | 0.85 ± 0.04    | 0.75 ± 0.05 **  | 0.82 ± 0.04    | 0.89 ± 0.05      |
| Liver/body weight               | 4.73 ± 0.18    | 4.84 ± 0.19    | 4.21 ± 0.21 *** | 4.51 ± 0.20 *  | 4.95 ± 0.22      |
| ALT (log <sub>10</sub> (IU/L))  | 1.81 ± 0.07    | 1.79 ± 0.12    | 1.60 ± 0.14     | 1.76 ± 0.11    | 1.76 ± 0.19      |
| AST (log <sub>10</sub> (IU/L))  | 2.24 ± 0.06    | 2.16 ± 0.10    | 2.17 ± 0.12     | 2.08 ± 0.10    | 1.98 ± 0.17      |
| GLDH (log <sub>10</sub> (IU/L)) | 1.29 ± 0.05    | 1.34 ± 0.09    | 1.19 ± 0.10     | 1.26 ± 0.08    | 1.27 ± 0.14      |
| Liver score                     | 0.95 ± 0.38    | 1.25 ± 0.84 ** | 3.33 ± 1.05     | 2.11 ± 0.68    | 5.33 ± 1.33      |
| BUN (mg/dL)                     | 9.34 ± 0.65    | 8.61 ± 0.85    | 6.90 ± 1.10 *   | 7.42 ± 0.88 *  | 6.10 ± 1.24 **   |
| Cr (mg/dL)                      | 0.58 ± 0.07    | 0.53 ± 0.07    | 0.57 ± 0.08     | 0.61 ± 0.07    | 0.62 ± 0.08      |
| BUN_Cr                          | 16.19 ± 1.20   | 16.89 ± 1.46   | 22.90 ± 23.74   | 21.73 ± 21.53  | 15.62 ± 25.83    |
| Albumin (g/dL)                  | 3.87 ± 0.09    | 3.66 ± 0.14    | 3.57 ± 0.17     | 3.70 ± 0.14    | 3.94 ± 0.23      |
| Globulin(g/dL)                  | 1.88 ± 0.27    | 1.61 ± 0.28 *  | 1.81 ± 0.30     | 1.89 ± 0.28    | 2.05 ± 0.31      |
| Total protein (g/L)             | 5.69 ± 0.25    | 5.25 ± 0.30    | 5.49 ± 0.36     | 5.67 ± 0.32    | 6.02 ± 0.41      |
| Glucose (mg/dL)                 | 214.08 ± 11.46 | 205.47 ± 15.85 | 203.03 ± 19.86  | 224.90 ± 16.37 | 164.52 ± 24.19 * |
| Total bilirubin (mg/dL)         | 0.16 ± 0.04    | 0.17 ± 0.07    | 0.29 ± 0.10     | 0.42 ± 0.06 ** | 0.30 ± 0.10      |

All significance tests of difference from control. Mortality statistical significance by Fisher's exact test; liver score by Cochran-Mantel-Haenszel chi-square; \*  $p \leq 0.05$  for differences from controls; \*\*  $p \leq 0.01$  for differences from controls; \*\*\*  $p \leq 0.001$  for differences from controls.

Table S5. Summary of data for MCYR<sup>1</sup>.

| <b>Male</b>                     |               |                  |                  |                    |                   |
|---------------------------------|---------------|------------------|------------------|--------------------|-------------------|
| Dose                            | Control       | 3 mg/kg          | 5 mg/kg          | 7 mg/kg            | 11 mg/kg          |
| Number of animals               | 18            | 6                | 6                | 9                  | 6                 |
| Morbidity (%)                   | 0             | 0                | 0                | 11.1               | 33.3              |
| Weight Change (g.)              | -1.70 ± 0.20  | -1.83 ± 0.34     | -1.72 ± 0.34     | -2.96 ± 0.28 ***   | -2.67 ± 0.34 *    |
| Liver weight (g.)               | 1.11 ± 0.05   | 1.06 ± 0.09      | 1.11 ± 0.09      | 1.15 ± 0.07        | 1.49 ± 0.09 ***   |
| Liver/body weight               | 5.05 ± 0.20   | 4.84 ± 0.33      | 5.07 ± 0.33      | 5.40 ± 0.26        | 6.66 ± 0.35 ***   |
| ALT (log <sub>10</sub> (IU/L))  | 2.02 ± 0.18   | 1.90 ± 0.25      | 2.07 ± 0.25      | 2.33 ± 0.21        | 3.36 ± 0.27 ***   |
| AST (log <sub>10</sub> (IU/L))  | 2.21 ± 0.10   | 2.05 ± 0.15      | 2.27 ± 0.15      | 2.27 ± 0.12        | 2.94 ± 0.17 ***   |
| GLDH (log <sub>10</sub> (IU/L)) | 1.39 ± 0.09   | 1.24 ± 0.15      | 1.50 ± 0.15      | 1.74 ± 0.12 **     | 2.35 ± 0.16 ***   |
| Liver score                     | 2.17 ± 0.49   | 2.00 ± 0.93      | 1.67 ± 1.05      | 7.89 ± 1.32 **     | 13.67 ± 0.92 **   |
| BUN (mg/dL)                     | 8.32 ± 1.23   | 6.25 ± 1.48 *    | 6.42 ± 1.48      | 11.47 ± 1.32 ***   | 11.49 ± 1.55 **   |
| Cr (mg/dL)                      | 0.49 ± 0.02   | 0.47 ± 0.03      | 0.49 ± 0.03      | 0.54 ± 0.03        | 0.52 ± 0.03       |
| BUN_Cr                          | 16.99 ± 2.02  | 14.10 ± 2.31 *   | 13.71 ± 2.31 *   | 20.95 ± 2.32 ***   | 21.96 ± 2.40 **   |
| Albumin (g/dL)                  | 3.61 ± 0.11   | 3.67 ± 0.16      | 3.69 ± 0.16      | 4.08 ± 0.13 ***    | 4.02 ± 0.18 *     |
| Globulin(g/dL)                  | 1.82 ± 0.20   | 1.86 ± 0.22      | 1.88 ± 0.22      | 2.02 ± 0.21 *      | 2.08 ± 0.22 *     |
| Total protein (g/L)             | 5.41 ± 0.14   | 5.62 ± 0.22      | 5.66 ± 0.22      | 6.06 ± 0.18 **     | 6.18 ± 0.25 **    |
| Glucose (mg/dL)                 | 236.14 ± 7.45 | 196.00 ± 12.90 * | 196.33 ± 12.90 * | 145.21 ± 11.17 *** | 85.47 ± 15.80 *** |
| Total bilirubin (mg/dL)         | 0.27 ± 0.16   | 0.27 ± 0.17      | 0.28 ± 0.17      | 0.38 ± 0.16*       | 0.41 ± 0.16 *     |

  

| <b>Female</b>                   |                |                |                   |                   |                   |
|---------------------------------|----------------|----------------|-------------------|-------------------|-------------------|
| Dose                            | Control        | 3 mg/kg        | 5 mg/kg           | 7 mg/kg           | 11 mg/kg          |
| Number of animals               | 18             | 6              | 6                 | 9                 | 6                 |
| Morbidity (%)                   | 0              | 0              | 0                 | 0                 | 16.7              |
| Weight Change (g.)              | -1.19 ± 0.14   | -1.30 ± 0.25   | -1.55 ± 0.30      | -1.70 ± 0.20 *    | -2.08 ± 0.25 **   |
| Liver weight (g.)               | 0.88 ± 0.02    | 0.87 ± 0.04    | 0.98 ± 0.05       | 0.89 ± 0.03       | 1.02 ± 0.04 **    |
| Liver/body weight               | 5.01 ± 0.09    | 4.75 ± 0.15    | 5.18 ± 0.19       | 5.35 ± 0.12 *     | 6.40 ± 0.15 ***   |
| ALT (log <sub>10</sub> (IU/L))  | 2.07 ± 0.22    | 1.87 ± 0.34    | 2.64 ± 0.38       | 2.33 ± 0.26       | 3.50 ± 0.32 ***   |
| AST (log <sub>10</sub> (IU/L))  | 2.35 ± 0.15    | 2.09 ± 0.25    | 2.61 ± 0.29       | 2.59 ± 0.19       | 3.41 ± 0.24 ***   |
| GLDH (log <sub>10</sub> (IU/L)) | 1.42 ± 0.12    | 1.36 ± 0.20    | 1.77 ± 0.23       | 1.59 ± 0.15       | 2.30 ± 0.19 ***   |
| Liver score                     | 0.00 ± 0.00    | 0.00 ± 0.00    | 3.75 ± 2.39       | 3.89 ± 0.99 **    | 11.83 ± 1.17 **   |
| BUN (mg/dL)                     | 8.06 ± 0.85    | 9.05 ± 1.43    | 9.00 ± 1.75       | 9.39 ± 1.17       | 15.08 ± 1.32 ***  |
| Cr (mg/dL)                      | 0.53 ± 0.03    | 0.52 ± 0.04    | 0.50 ± 0.05       | 0.51 ± 0.03       | 0.49 ± 0.04       |
| BUN_Cr                          | 15.02 ± 1.99   | 15.86 ± 3.35   | 16.80 ± 4.11      | 18.51 ± 2.74      | 33.28 ± 3.11 ***  |
| Albumin (g/dL)                  | 3.96 ± 0.11    | 3.84 ± 0.19    | 3.74 ± 0.23       | 3.84 ± 0.15       | 3.39 ± 0.18 **    |
| Globulin(g/dL)                  | 1.61 ± 0.25    | 1.66 ± 0.27    | 1.58 ± 0.27       | 1.57 ± 0.25       | 1.24 ± 0.26 **    |
| Total protein (g/L)             | 5.53 ± 0.27    | 5.54 ± 0.39    | 5.35 ± 0.42       | 5.40 ± 0.31       | 4.61 ± 0.37 *     |
| Glucose (mg/dL)                 | 229.09 ± 19.81 | 199.66 ± 25.72 | 150.26 ± 27.57 ** | 173.09 ± 21.50 ** | 76.13 ± 24.78 *** |
| Total bilirubin (mg/dL)         | 0.29 ± 0.12    | 0.27 ± 0.14    | 0.30 ± 0.15       | 0.27 ± 0.13       | 0.34 ± 0.14       |

All significance tests of difference from control. Mortality statistical significance by Fisher's exact test; liver score by Cochran-Mantel-Haenszel chi-square; \*  $p \leq 0.05$  for differences from controls; \*\*  $p \leq 0.01$  for differences from controls; \*\*\*  $p \leq 0.001$  for differences from controls.
